# Supplementary material
Source: Frontiers journal article supplement (https://www.frontiersin.org/articles/10138)
Supplement: Data_Sheet_5.XLS [file Data_Sheet_5.XLS]

## Sheet: Sheet1
Table S5 - RNA-seq analysis of MSEW effects (B6 mice; genes with Q value<0.01 only)
Symbol	log2 (Fold-change)	P-value	Q-value
0610007P08Rik	-0.544171	0.000204335	0.00311788
0610007P14Rik	-0.354655	0.000817157	0.00917181
0610025P10Rik	0.374054	0.000120283	0.002036
1100001E04Rik	-1.18371	7.03195e-05	0.00130187
1110005A23Rik	-1.14734	2.93734e-10	2.23599e-08
1110014J01Rik	0.365956	0.000253537	0.00370676
1110059G10Rik	-0.484456	0.000254591	0.00371817
1190005P17Rik	-0.599101	0.000889665	0.0098238
1700022C21Rik	-0.787352	0.000360304	0.00490951
1810012P15Rik	0.453064	0.000144514	0.00235263
2010209O12Rik	0.537082	1.02746e-06	3.58062e-05
2210010N04Rik	0.480071	4.08558e-06	0.000117447
2310007D09Rik	-1.82308	0.000116639	0.00197924
2310021P13Rik	0.390006	9.938e-05	0.00173165
2310028H24Rik	0.446885	1.42908e-06	4.83192e-05
2310047O13Rik	-0.387984	0.000388741	0.00520844
2310067B10Rik	0.371453	0.000469855	0.00602848
2410002O22Rik	-0.318315	0.000556402	0.00685491
2410014A08Rik	0.524978	1.71308e-08	8.84181e-07
2410066E13Rik	1.03475	3.71011e-22	1.48688e-19
2600011E07Rik	1.05538	8.72968e-12	8.87691e-10
2610028A01Rik	-0.780845	0.000573561	0.00702818
2610030H06Rik	-0.355441	0.000170583	0.00268712
2610507B11Rik	0.404711	9.99064e-06	0.000250243
2610528K11Rik	0.526098	2.58167e-08	1.2933e-06
2810405K02Rik	0.437293	3.46328e-05	0.000723784
2900010M23Rik	0.494254	2.50839e-05	0.000549506
2900026A02Rik	0.511326	3.37324e-06	0.000100798
3110003A17Rik	-0.692921	4.98976e-06	0.000137354
3110003A22Rik	0.435179	3.90232e-05	0.000803218
4632419K20Rik	0.519654	1.21251e-06	4.17214e-05
4833424O15Rik	-0.339482	0.000346442	0.00475869
4921513D23Rik	0.385988	2.95768e-05	0.00063367
4930402E16Rik	0.670158	0.000349939	0.00478742
4930408O21Rik	-0.620836	5.30518e-05	0.00103417
4930432O21Rik	-0.412793	0.000226542	0.00338471
4930506M07Rik	-0.388067	9.65161e-05	0.00168823
4931428F04Rik	0.672157	4.96344e-06	0.000136907
4932409I22Rik	0.341737	0.000453575	0.00586934
4933421E11Rik	-0.454531	8.16448e-05	0.00145805
4933434I06Rik	-0.780132	0.000289222	0.00411371
5730409E04Rik	0.438911	1.56084e-05	0.000362936
5730557B15Rik	1.22812	1.40299e-15	2.54896e-13
6230409E13Rik	0.350659	0.000116152	0.00197343
6330403A02Rik	0.847678	5.00106e-20	1.79328e-17
6430526N21Rik	0.676901	1.22385e-07	5.36211e-06
6430548M08Rik	0.579648	5.92708e-10	4.14166e-08
6430598A04Rik	0.599474	9.12624e-10	6.09579e-08
8430419L09Rik	0.490582	1.09012e-07	4.82274e-06
9030418K01Rik	0.691345	1.70246e-09	1.08401e-07
9130213B05Rik	0.743267	8.24914e-11	7.2053e-09
9330128J19Rik	-0.685036	1.29256e-06	4.40311e-05
9430031J16Rik	1.03511	6.75227e-08	3.18361e-06
9930013L23Rik	0.884248	7.77917e-06	0.000202288
A130090K04Rik	0.769513	0.000408679	0.00543814
A230046K03Rik	-0.424434	0.000201201	0.00308388
A230051G13Rik	0.635648	5.93825e-05	0.00113485
A230069A22Rik	-0.512801	1.47576e-06	4.94518e-05
A630033E08Rik	-0.617854	4.1178e-06	0.000118049
A630047E20Rik	0.98496	0.000228186	0.0033981
A730069N07Rik	1.02358	0.000688116	0.0080483
Aars2	0.481314	0.000606995	0.00733887
Aatk	0.595515	6.19137e-11	5.55024e-09
AB182283	0.486881	1.47937e-05	0.000348151
Abhd2	1.00233	1.71264e-19	5.18589e-17
Abhd6	-0.375109	0.000341642	0.00471021
Abhd8	0.300773	0.000901234	0.0099194
Abl2	0.461106	1.65648e-06	5.45198e-05
Abr	0.325687	0.000204847	0.0031222
Acadl	-0.510284	6.68428e-06	0.000178831
Acat2	-0.356126	0.000650124	0.00770983
Acsl3	-0.333586	0.000222012	0.00333621
Acvr1b	0.372582	6.39308e-05	0.00120321
Acvr1c	0.373543	0.000491421	0.00623473
Acvr2b	1.90258	0.000222401	0.00333621
Adamts2	1.08847	2.94861e-06	8.94827e-05
Adamtsl2	0.607427	0.000781732	0.00884111
Adar	0.784689	5.26854e-15	8.75476e-13
Adck2	0.588153	2.09592e-06	6.67267e-05
Adcy1	0.343086	8.849e-05	0.00156187
Adcy3	0.549517	1.5933e-06	5.25673e-05
Adcy5	0.491527	1.70272e-07	7.18307e-06
Adcy9	0.578329	6.46879e-07	2.4083e-05
Add2	1.09006	2.53608e-25	1.46998e-22
Adh5	-0.450775	4.62425e-06	0.000129119
Adra1a	0.611483	0.000373654	0.00505601
Adra2c	0.587518	7.76884e-07	2.83802e-05
Agpat3	0.343932	0.00020942	0.00318123
Agrn	0.398278	6.0111e-05	0.00114556
Agtrap	0.715998	1.9752e-05	0.000445598
AI427515	0.346875	0.000237139	0.00350086
AI595366	0.529891	0.000440108	0.00574967
AI646023	0.447912	0.000498795	0.00629896
AI894139	0.50461	0.000133892	0.0022141
Aldh5a1	0.786511	2.44497e-09	1.48068e-07
Alg10b	0.4377	8.31418e-05	0.0014809
Alg12	-0.669795	0.00023298	0.00345064
Als2cr2	-0.437619	6.33092e-05	0.00119813
Amz1	0.542071	4.08588e-05	0.000833446
Ankrd13b	0.341929	0.0006942	0.00809861
Ankrd50	0.614192	1.3785e-06	4.6725e-05
Ankrd52	1.03644	9.51199e-20	3.24026e-17
Anln	-0.945654	1.69939e-11	1.64226e-09
Ap2a1	0.307675	0.000811827	0.0091195
Ap2a2	0.304798	0.000558481	0.00687333
Ap3s1	-0.421312	0.000223474	0.00334255
Apc2	0.522997	4.0616e-08	1.97655e-06
Apod	-0.483097	3.91995e-07	1.53929e-05
Ar	1.21908	4.35751e-05	0.000875488
Arc	-0.334487	0.000472278	0.0060425
Arid5b	1.12145	2.95413e-15	5.22767e-13
Arl10	0.579523	0.000124554	0.00208688
Arl5a	0.319577	0.000753922	0.00866184
Armcx5	-0.340275	0.000769658	0.00876941
Arpc3	-0.375101	5.28089e-05	0.00103239
Arrb1	0.555219	4.75086e-10	3.40819e-08
Aspa	-0.938172	9.04738e-09	4.99108e-07
Aste1	1.1624	0.000136879	0.00225527
Atn1	0.410479	5.77096e-06	0.000156956
Atp10b	-1.24313	0.000494655	0.00625828
Atp1b1	-0.290979	0.000505656	0.00634915
Atp2a3	0.549241	0.000510026	0.00639339
Atp2b3	0.623913	4.0024e-09	2.35072e-07
Atp2b4	1.01678	7.37012e-25	3.71945e-22
Atp5c1	-0.350576	9.71799e-05	0.00169766
Atp5f1	-0.338919	0.000149718	0.00241713
Atp6ap2	-0.287339	0.000758168	0.00866677
Atp6v1d	-0.296862	0.000614509	0.00739691
Atp6v1h	-0.348994	8.87836e-05	0.00156503
Atp8a2	0.757942	5.891e-05	0.00113057
Atp9a	0.412935	3.42401e-06	0.000102091
Atpif1	-0.347415	0.000107092	0.00185183
Atxn1	1.03783	5.16832e-15	8.69426e-13
Atxn10	-0.312275	0.000317876	0.00445157
Atxn1l	0.507415	7.49071e-07	2.74378e-05
Atxn2l	0.364776	0.000392204	0.00524967
Atxn7l3	0.405429	6.28631e-06	0.000169283
AU040320	0.534144	1.21749e-05	0.000295712
AW555464	0.502916	1.69131e-08	8.76264e-07
B2m	-0.453429	2.07942e-06	6.6512e-05
B3galt2	-0.327068	0.000221403	0.00333621
B4galnt4	0.357683	0.00086277	0.00959682
B4galt2	0.33287	0.000636346	0.00758604
Bai1	0.474864	2.33764e-07	9.68166e-06
Bai2	0.648758	7.86559e-13	9.56934e-11
Baiap2	0.38781	5.36435e-05	0.00104272
Bank1	-1.92628	1.56913e-05	0.000363621
Bat2	0.82976	2.55113e-19	7.24203e-17
Bat3	0.399734	2.24461e-05	0.00049798
Bbs1	0.472996	0.000362773	0.00493328
Bbs4	-0.42765	4.30772e-05	0.000868299
BC003331	-0.369086	0.000546541	0.00677015
BC005764	0.591964	1.58647e-08	8.28245e-07
BC017158	0.526472	0.000526962	0.00656342
BC017612	-0.951052	0.000804026	0.00903932
BC021395	0.472364	2.58481e-06	7.98653e-05
BC025575	1.01934	2.58913e-25	1.46998e-22
BC043098	0.350642	7.7673e-05	0.00140368
BC049635	1.84225	4.75236e-10	3.40819e-08
BC050078	-0.521208	7.46758e-05	0.00135852
Bcas1	-0.85325	5.30895e-20	1.85486e-17
Bckdhb	-0.615385	2.62882e-05	0.000571296
Bcl2l2	0.327127	0.000328438	0.00455269
Bcl9l	0.767515	4.57279e-12	4.90621e-10
Bcr	0.337871	0.000238019	0.00351001
Bet1	-0.477711	0.000131872	0.00219132
Bhlhb9	-0.353765	0.000126825	0.00212038
Bloc1s1	-0.481616	4.46413e-05	0.00089191
Bmpr2	0.802827	4.7298e-12	4.99599e-10
Bnip3	-0.40552	2.48763e-05	0.000545836
Bre	-0.436566	0.000237142	0.00350086
Bri3bp	0.3104	0.000590154	0.00717345
Brsk1	0.560736	1.07949e-09	7.07168e-08
Bsn	0.403386	4.4086e-06	0.000124389
Btbd14b	0.33679	0.000284611	0.00406937
Btbd7	1.10835	2.25695e-09	1.38528e-07
Btbd9	0.441903	3.80186e-06	0.000110457
Btf3	-0.38049	0.000741917	0.00855276
Bzrap1	0.438741	3.18998e-05	0.000679167
C130038G02Rik	0.615475	1.63096e-05	0.000375397
C1galt1	0.587866	0.000720362	0.00833955
C1qbp	-0.34796	0.000412824	0.00547725
C1ql3	0.395999	1.23186e-05	0.000296038
C230021P08Rik	0.598624	5.26004e-05	0.00102979
C230081A13Rik	0.355932	0.000264995	0.00383722
C630035N08Rik	0.362151	0.000191067	0.00294894
C78339	0.621984	9.19223e-08	4.16124e-06
C79267	0.591235	2.59658e-07	1.06249e-05
Cabp5	-3.8757	1.9631e-06	6.29392e-05
Cabp7	0.938891	4.79158e-05	0.000950984
Cacna1b	0.787166	3.13602e-10	2.36085e-08
Cacna1c	1.26808	2.24653e-13	3.03081e-11
Cacna1e	0.578633	4.24577e-10	3.11037e-08
Cacna1g	0.823112	4.65285e-12	4.95311e-10
Cacna1h	0.464468	3.80448e-05	0.000787841
Cacna1i	0.431931	1.28016e-05	0.000304955
Cacnb1	0.544909	1.94232e-07	8.0936e-06
Cacng8	0.436333	0.000123294	0.00207412
Cacybp	-0.343515	0.000152424	0.00245058
Calm2	-0.387087	3.61251e-06	0.000107009
Caln1	0.996211	8.16857e-21	3.0918e-18
Camkk2	0.417753	3.22098e-05	0.000684697
Caml	-0.360057	0.000709257	0.00823197
Camta2	0.415286	3.97804e-06	0.000114841
Car2	-0.349153	0.000171295	0.00269522
Caskin1	0.453497	1.87793e-06	6.06365e-05
Cav2	-0.326252	0.000607882	0.00734308
Cbl	1.57423	1.34893e-19	4.37631e-17
Ccdc126	-0.426904	0.000667176	0.00786413
Ccdc132	-0.3393	0.000503504	0.00634667
Ccdc59	-0.533995	3.04297e-05	0.000650919
Ccdc64	0.558702	0.000634646	0.0075724
Ccdc85a	0.527864	7.47145e-06	0.000196537
Ccdc88c	0.955304	2.68901e-06	8.25236e-05
Ccm2	0.362864	0.000904736	0.0099499
Cct6a	-0.354501	6.45326e-05	0.00121286
Cd2ap	-0.581149	2.2476e-05	0.00049798
Cd302	-0.546496	0.00062077	0.00744596
Cd34	-0.32921	0.000595961	0.00722576
Cd7	-1.20718	0.000706633	0.00820957
Cd9	-0.434253	0.000679739	0.00798684
Cdc42bpb	0.421948	7.60338e-06	0.000198813
Cdc42ep2	-0.711057	6.9017e-06	0.000183001
Cdca7	-1.15931	7.94064e-07	2.88531e-05
Cdh13	0.36614	0.000111949	0.00191155
Cdh22	0.531262	1.44208e-06	4.86379e-05
Cdkl5	1.02204	4.45544e-11	4.07448e-09
Cds2	0.615443	3.07213e-12	3.40332e-10
Cecr6	0.342583	0.000317274	0.00445157
Celsr3	0.537932	1.56015e-05	0.000362936
Centg1	0.737172	1.1102e-16	2.25785e-14
Centg2	0.535066	7.34486e-09	4.11856e-07
Centg3	0.498823	9.31545e-08	4.20306e-06
Cept1	-0.332769	0.000882084	0.00976053
Cetn3	-0.408283	4.6364e-05	0.000923621
Chd3	0.485629	3.76688e-08	1.85298e-06
Chd4	0.359216	0.000185461	0.00287823
Chd5	0.6207	6.46383e-12	6.72337e-10
Chpf	0.331667	0.000492539	0.00624311
Chrm2	0.955247	0.000267247	0.00385753
Chsy3	-0.372106	0.00090096	0.0099194
Cic	0.608966	7.39887e-11	6.50432e-09
Cit	0.976186	9.60922e-14	1.37827e-11
Clcn6	0.555883	7.46497e-07	2.74172e-05
Cldn11	-0.782631	1.11133e-18	2.96921e-16
Clec16a	0.398974	5.72489e-05	0.00110336
Clec2d	-1.16154	0.000783576	0.00884111
Clip2	0.411098	1.03954e-05	0.000258954
Clstn1	0.511351	5.52923e-09	3.13922e-07
Clu	-0.305175	0.000311882	0.0044084
Cmtm4	1.59143	1.74242e-25	1.07919e-22
Cnp	-0.554351	9.80886e-11	8.30158e-09
Col6a1	0.524441	1.00493e-05	0.000251252
Commd3	-0.420693	7.67975e-05	0.0013897
Coq10a	-0.364638	0.0007838	0.00884111
Coq10b	-0.387529	0.000487153	0.0061979
Cpeb2	0.506171	0.000318914	0.00445245
Cpeb3	0.322488	0.000583416	0.00711058
Cpeb4	0.547552	9.30487e-06	0.000236105
Cplx3	-0.753738	1.7785e-09	1.12716e-07
Cpne1	-0.390316	0.000213412	0.00322747
Cpne7	0.406662	0.000147419	0.00239134
Crim1	0.615861	1.26063e-08	6.78944e-07
Cript	-0.369979	0.000210791	0.00319492
Crocc	0.724153	1.06974e-07	4.74799e-06
Crtc1	0.550034	1.98899e-09	1.2369e-07
Cryab	-0.500459	1.68342e-07	7.14588e-06
Csda	-0.547127	1.42589e-05	0.000337898
Csnk1g2	0.3147	0.000755076	0.00866677
Ctgf	-0.401273	2.16968e-05	0.000484658
Ctsc	-0.792122	5.89247e-06	0.000159942
Ctss	-0.601221	1.8564e-09	1.17108e-07
Cttnbp2	-0.368349	0.000347515	0.00476382
Cugbp1	0.603132	2.30835e-07	9.58949e-06
Cux2	0.55317	1.5294e-06	5.08284e-05
Cwc15	-0.484931	9.1951e-07	3.25435e-05
Cxcl12	0.349834	0.000778875	0.00884111
Cxcr7	-0.487496	0.000456152	0.00588034
Cyb5	-0.358429	0.00071274	0.00826536
Cyld	0.357031	8.03607e-05	0.00144078
D0H4S114	-0.341445	0.000347346	0.00476382
D10Bwg1379e	0.932504	4.50209e-14	6.81616e-12
D14Abb1e	-0.377553	0.000315651	0.00444324
D15Wsu169e	0.472848	1.2214e-05	0.00029577
D18Ertd653e	0.754016	5.75797e-10	4.06519e-08
D230014K01Rik	0.528356	0.000755641	0.00866677
D430039N05Rik	0.410007	4.78229e-06	0.000132716
D430041B17Rik	0.357823	9.41112e-05	0.00164828
D430041D05Rik	0.333583	0.000203806	0.00311329
D5Ertd579e	0.370846	7.15634e-05	0.00131596
D730040F13Rik	0.488769	0.000235249	0.00348046
D930001I22Rik	0.596813	8.74299e-06	0.000223512
Dact1	0.745709	0.000252775	0.00370336
Dact2	0.600441	5.24765e-09	3.01707e-07
Dag1	0.645071	6.90606e-11	6.15045e-09
Dagla	0.514103	1.26789e-07	5.48451e-06
Dclre1a	-0.614081	0.000723716	0.00836912
Dctn1	0.373635	4.24351e-05	0.000859169
Ddah1	0.428577	0.000853922	0.00951394
Ddc	-0.850352	5.12066e-05	0.00100684
Ddi2	1.52673	2.45806e-10	1.92492e-08
Ddx5	-0.286991	0.000675442	0.00794782
Ddx50	-0.41362	4.03683e-05	0.000824676
Dek	-0.333267	0.000574092	0.00702837
Depdc5	0.430477	0.000425986	0.00558967
Depdc6	0.874177	2.49139e-06	7.73296e-05
Det1	-0.724219	0.000511568	0.00640094
Dgcr2	0.349667	0.000172213	0.00270654
Dgkh	1.00686	3.66246e-05	0.000760358
Dgki	0.978899	1.80095e-08	9.26027e-07
Dhx34	1.01548	1.49976e-08	7.85987e-07
Diap1	0.708106	3.05589e-10	2.31331e-08
Dio3	0.904496	3.43152e-07	1.36719e-05
Dip2b	0.54757	0.000458269	0.00589647
Disp2	0.324232	0.000241586	0.00355108
Dkc1	-0.583403	4.39366e-06	0.000124389
Dld	-0.376096	3.25134e-05	0.00068793
Dlg4	0.311757	0.000367811	0.00499183
Dlgap2	0.388889	0.00042399	0.00557653
Dlgap3	0.653435	5.07802e-13	6.29028e-11
Dlgap4	0.304475	0.000639464	0.0076099
Dmd	-0.369646	0.00016314	0.00258783
Dmn	0.397464	5.99874e-05	0.0011448
Dmpk	1.38307	0.000844675	0.00942633
Dnaja1	-0.333505	0.000161423	0.00256657
Dnajc16	0.385174	0.000331773	0.00458958
Dnajc5	0.434373	1.0241e-06	3.57805e-05
Dnttip2	-0.430065	0.000180009	0.00280321
Dohh	0.339261	0.000839461	0.00938816
Dok6	0.826653	0.000336562	0.00465111
Dpp8	0.340612	0.000226935	0.00338687
Dpy19l3	0.543599	4.70785e-06	0.000130917
Dpysl3	1.13027	1.51635e-11	1.47584e-09
Dusp3	0.800454	4.46736e-13	5.689e-11
Dusp4	0.679725	0.000873744	0.00969514
Dusp6	-0.395974	0.000100123	0.00174237
Dusp8	0.940779	2.52809e-19	7.24203e-17
Dvl3	0.463024	0.000261123	0.00378518
Dynlrb1	-0.301675	0.000661048	0.00781896
Dyrk2	0.731202	1.46214e-08	7.72217e-07
E130009J12Rik	-0.728442	0.000560467	0.00688632
E130012A19Rik	0.322438	0.000613108	0.00738657
E130311K13Rik	-0.523377	0.00042622	0.00558967
E2f2	1.37716	0.0002752	0.0039514
E330009J07Rik	0.873624	0.000328975	0.0045555
Ecm2	-0.805652	0.000251044	0.00368612
Eef2	0.326733	0.000175285	0.00274217
Efcab7	-1.51297	0.000576349	0.00703703
Efhd1	-0.383643	0.000322338	0.00448182
Efnb1	0.439216	0.00062278	0.00745694
EG240055	1.4573	9.13391e-11	7.92731e-09
EG433182	3.21058	0.000151314	0.00243713
EG434008	1.45308	2.98501e-26	2.14073e-23
EG545963	1.34637	0.000781036	0.00884111
Egln2	0.354156	0.000314521	0.00443651
Egr1	-0.439998	3.13761e-07	1.25744e-05
Egr3	0.720955	3.29244e-10	2.46499e-08
Ehmt2	0.400169	1.89366e-05	0.000429335
Eif1b	-0.343782	0.000152694	0.00245066
Eif2a	-0.409812	7.26348e-05	0.00133206
Eif2c1	1.15373	1.45097e-10	1.16988e-08
Eif2c2	1.23465	2.71043e-07	1.10576e-05
Eif4ebp2	1.04349	3.33586e-12	3.63636e-10
Eif5b	-0.424845	2.3011e-06	7.20799e-05
Elavl3	0.44521	1.20135e-05	0.000294214
Elfn2	1.25584	1.32429e-30	1.50373e-27
Elk1	0.335142	0.000457385	0.00589067
Ell2	-0.508515	4.16611e-06	0.000119009
Elmo1	0.35607	0.000512278	0.00640394
Enpp2	-0.63321	4.49627e-12	4.8624e-10
Enpp6	-1.10728	9.67941e-06	0.000242894
Epb4-1	0.474466	0.00077866	0.00884111
Epb4-1l3	-0.362536	5.29134e-05	0.00103295
Epha6	0.567479	0.000108316	0.00186118
Ephb6	0.313537	0.000775144	0.00882382
Eps8l3	0.416729	0.000724144	0.00836912
Erbb2ip	-0.362776	0.0001583	0.00252281
Erbb4	1.05168	3.97061e-07	1.54581e-05
Erc1	0.332482	0.000780979	0.00884111
Erf	0.474367	4.41832e-06	0.000124389
Ermn	-0.896059	1.66622e-19	5.15999e-17
Evi2a	-0.724665	3.78275e-09	2.23133e-07
Extl3	0.600235	9.29118e-11	7.98674e-09
F630110N24Rik	1.65053	1.95175e-13	2.65945e-11
Fa2h	-0.863166	1.13031e-13	1.60433e-11
Fads2	0.485407	4.26842e-06	0.00012117
Fbf1	0.569959	8.82253e-07	3.14701e-05
Fbxl18	1.18012	1.57604e-10	1.26325e-08
Fbxl19	0.515773	2.1665e-06	6.84934e-05
Fbxl22	-0.504594	2.81106e-05	0.000604431
Fbxo31	0.721142	2.30118e-12	2.65727e-10
Fbxo6	-0.431995	0.000543315	0.0067486
Fcho1	0.450934	0.000504911	0.00634915
Fgd1	0.742621	3.96622e-05	0.000812688
Fgfr2	-0.465221	2.41001e-05	0.000531372
Fhl2	-0.368379	0.000381165	0.0051308
Fkbp3	-0.418152	5.39029e-05	0.00104478
Fktn	0.48445	0.000469656	0.00602848
Fli1	-0.667678	0.000279525	0.00400506
Flrt1	0.73691	9.31962e-11	7.98674e-09
Flrt2	0.680999	7.3347e-09	4.11856e-07
Flrt3	-0.405259	0.000109466	0.00187149
Flywch1	0.777859	8.76873e-17	1.81035e-14
Folh1	-1.21829	6.90717e-06	0.000183001
Fos	-0.993626	3.43712e-16	6.41564e-14
Fosl2	0.393121	0.000121649	0.00205401
Foxk1	0.500535	3.27683e-07	1.30939e-05
Foxn3	0.775242	7.54358e-05	0.00136869
Foxo3a	0.878294	5.06215e-10	3.61136e-08
Foxp2	-0.579634	5.48898e-09	3.12941e-07
Freq	0.407289	3.6887e-06	0.000108324
Frmd4b	-0.597735	4.41838e-05	0.000884066
Fstl4	0.787031	0.000832313	0.0093189
Fubp3	-0.589255	8.51213e-07	3.06032e-05
Fus	-0.373865	5.20474e-05	0.0010219
Fxyd7	-0.568844	1.30719e-09	8.48177e-08
Gab2	1.07445	9.03405e-07	3.20568e-05
Gabbr2	0.65243	7.54642e-12	7.73139e-10
Gabra1	-0.298974	0.000443104	0.00577774
Gabra5	-0.349261	0.00013746	0.00226212
Gad1	-0.306317	0.000419343	0.00554216
Galnt6	-0.828982	4.07096e-07	1.58037e-05
Gan	3.05115	1.55651e-09	9.97532e-08
Garnl4	0.311502	0.00044861	0.00582167
Gatad2b	1.1527	6.28571e-14	9.30969e-12
Gatm	-0.600436	4.6746e-10	3.38809e-08
Gats	0.399717	2.27444e-05	0.000503109
Gbe1	-0.56394	0.000359031	0.00489706
Gca	-0.409677	0.000301993	0.0042775
Gcn1l1	1.04848	1.53912e-17	3.55458e-15
Gfod1	0.332809	0.000363426	0.00493723
Gfpt1	0.840823	6.85153e-08	3.21927e-06
Gga1	0.503975	2.79041e-06	8.52513e-05
Ghitm	-0.288053	0.000714425	0.00827786
Git1	0.307587	0.000538436	0.0067002
Gjb1	-0.592261	0.00014864	0.00240258
Gjb2	0.706505	1.20268e-05	0.000294214
Gje1	-0.390528	0.000408145	0.00543634
Glg1	0.840871	2.40607e-14	3.81222e-12
Glra3	1.04898	0.000547184	0.00677196
Glrb	-0.377502	1.22423e-05	0.00029577
Gltscr2	0.396489	0.00020765	0.00315786
Gm347	0.460149	3.4451e-05	0.000722199
Gm672	0.340095	0.000345332	0.00474822
Gm944	0.72231	1.02408e-09	6.7411e-08
Gm996	0.519597	9.92794e-08	4.44994e-06
Gna12	0.363962	0.00054397	0.00675058
Gnas	-0.455113	5.8512e-08	2.78771e-06
Gnaz	0.343445	0.000687555	0.0080483
Gng7	0.610103	5.83572e-11	5.30117e-09
Golga3	0.428323	0.000174752	0.00273831
Gpc5	-0.453064	1.51496e-05	0.000354687
Gpd1l	1.05096	4.52686e-17	9.94886e-15
Gpd2	0.578097	7.3907e-07	2.72915e-05
Gphn	-0.401067	7.43593e-05	0.00135457
Gpm6b	-0.312171	0.000203674	0.00311329
Gpr124	0.715605	1.52282e-05	0.000355917
Gpr155	0.693756	0.000105435	0.00183013
Gpr161	2.10676	6.6893e-07	2.48361e-05
Gpr162	0.37632	3.24714e-05	0.00068793
Gpr173	0.476002	0.000397442	0.00530935
Gpr26	1.27114	3.85763e-25	2.02169e-22
Gpr27	0.675591	1.0152e-07	4.53547e-06
Gpr37	-0.602484	8.68453e-10	5.85819e-08
Gprin1	0.405667	6.42096e-06	0.000172568
Gprin3	1.29857	1.11284e-05	0.0002757
Gpsm2	-0.499753	0.000156223	0.00249554
Gpx4	-0.473042	0.000218736	0.00330433
Gramd1b	0.660257	1.64003e-07	7.00533e-06
Grb14	-0.468215	0.000380989	0.0051308
Grik3	0.376715	4.54269e-05	0.000906277
Grik4	0.427684	0.000382254	0.00513668
Grik5	0.559336	1.40703e-09	9.08636e-08
Grin1	0.570383	8.39259e-10	5.68943e-08
Grin2a	1.15551	3.7754e-06	0.000110166
Grin2b	1.01975	2.37544e-19	7.03645e-17
Grin2d	1.14325	4.88264e-13	6.10374e-11
Grin3a	0.845669	1.03677e-08	5.6735e-07
Grit	1.1133	1.82964e-31	2.26642e-28
Grlf1	0.434955	1.30855e-06	4.44647e-05
Grm1	0.719958	1.25081e-07	5.42789e-06
Grm4	0.643919	0.000190226	0.00294213
Gsto1	-0.413518	0.000210215	0.00318974
Gstp1	-0.460566	0.00010823	0.00186118
Gtf3c4	0.729713	4.14696e-09	2.42517e-07
Hap1	0.406111	8.03129e-06	0.000206876
Hcn2	0.50568	8.40201e-08	3.82896e-06
Hcn3	0.459673	0.000661961	0.00782296
Hdac4	0.638955	0.000320514	0.00446556
Hdac5	0.505739	1.75904e-07	7.39773e-06
Helz	0.808811	4.54603e-06	0.000127457
Herc4	-0.38976	0.000397421	0.00530935
Hhipl1	1.63198	1.18328e-05	0.000291035
Hic2	0.624912	0.000452034	0.00585496
Hipk2	2.06434	3.04136e-25	1.65766e-22
Hipk3	0.641344	1.18966e-08	6.45827e-07
Hivep3	1.0178	3.12806e-16	6.00324e-14
Hk1	0.326455	0.000273492	0.00393516
Hmbox1	1.16915	1.10899e-07	4.89033e-06
Hmgn3	-0.45252	7.31292e-05	0.00133574
Hnrnpa2b1	-0.469217	3.87568e-08	1.89964e-06
Hnrnpu	-0.325334	0.000154831	0.0024762
Hnrpdl	-0.496344	2.32161e-08	1.17164e-06
Hnrpll	-0.339679	0.000611625	0.00737523
Homer2	0.769886	5.53913e-08	2.65579e-06
Hpgd	-0.658057	0.000189662	0.00293674
Hrk	0.632366	1.01379e-11	1.01573e-09
Hrsp12	-0.473871	7.27523e-05	0.00133228
Hs6st3	1.14426	1.7503e-05	0.000400833
Hsd17b12	-0.362911	0.000108316	0.00186118
Hsf2	-0.496294	1.65035e-05	0.000379218
Hsp90aa1	-0.300054	0.0004559	0.00588034
Hspa8	-0.291702	0.000752275	0.00865021
Htatsf1	-0.314867	0.000444749	0.00579364
Htr1b	0.91836	3.44229e-05	0.000722199
Htt	0.671677	2.2739e-09	1.38943e-07
Icam5	0.54734	1.88464e-09	1.18342e-07
Icmt	0.397337	5.91397e-05	0.00113339
Id2	-0.32017	0.00038144	0.0051308
Ide	0.413627	0.000123449	0.00207412
Ift74	-0.5867	1.22258e-05	0.00029577
Igf2	0.366414	0.000558905	0.00687333
Igfbp7	-0.48573	8.34597e-05	0.00148269
Igsf9b	1.87656	5.72164e-09	3.23498e-07
Ihpk1	0.310166	0.000474014	0.00605902
Il15	-1.68329	0.000679931	0.00798684
Il33	-0.693928	2.77065e-10	2.12095e-08
Il6st	0.57983	1.19937e-08	6.48516e-07
Inppl1	0.499789	0.000256974	0.00374495
Ints1	0.68499	6.79058e-10	4.69687e-08
Ipo13	0.434681	3.27102e-05	0.000690211
Iqsec2	0.55942	9.71282e-10	6.45594e-08
Irgq	0.319464	0.000465818	0.00598796
Irs2	0.77076	7.92649e-10	5.42745e-08
Itm2b	-0.3243	0.000123295	0.00207412
Itpkb	0.631456	2.26115e-06	7.1149e-05
Itsn1	0.350929	0.00015251	0.00245058
Itsn2	0.47835	0.000327732	0.00454753
Jag2	0.600523	7.51672e-06	0.000196967
Jarid1c	0.476749	1.02972e-05	0.000256977
Jmjd2a	0.8846	1.35777e-10	1.11452e-08
Katnal1	0.813754	1.45055e-10	1.16988e-08
Katnal2	1.44653	0.0001092	0.00186929
Kcna2	1.14984	7.4938e-17	1.57093e-14
Kcna3	1.54865	3.39487e-11	3.16839e-09
Kcna6	0.518733	9.44731e-08	4.24848e-06
Kcnab1	-0.431185	2.41263e-06	7.54001e-05
Kcnab3	-0.786527	3.66021e-06	0.000107719
Kcnb1	0.853276	1.58005e-15	2.83286e-13
Kcnc1	0.395785	2.07788e-05	0.000467986
Kcnc3	0.481872	1.78492e-06	5.80462e-05
Kcng1	0.697871	1.92492e-09	1.20316e-07
Kcnh3	0.584254	1.02135e-09	6.7411e-08
Kcnh7	0.648763	0.000746837	0.00860219
Kcnip2	1.00181	3.13999e-06	9.48679e-05
Kcnip4	-0.350612	0.000184561	0.00286753
Kcnj6	0.527494	1.20704e-05	0.00029424
Kcnk12	0.719782	4.12382e-06	0.000118049
Kcnk13	-0.65145	0.000698658	0.00812973
Kcnk9	1.57365	1.60458e-12	1.88483e-10
Kcnma1	0.816463	3.16891e-12	3.48222e-10
Kcnn3	0.683401	8.7776e-07	3.1392e-05
Kcnq2	0.499743	1.80792e-07	7.57989e-06
Kcnq3	1.05439	2.59033e-10	2.00545e-08
Kcnq5	0.447915	0.000288434	0.00411187
Kctd20	0.385979	0.000384423	0.00515565
Kctd8	-0.544301	0.000572123	0.00701687
Kif13b	1.05867	4.39706e-05	0.000881094
Kif1c	0.391552	0.000143844	0.00235014
Kif26b	1.49832	2.60064e-12	2.95303e-10
Kifc2	-0.464584	8.22005e-08	3.77781e-06
Kiss1r	1.02791	8.95391e-08	4.06687e-06
Klf12	0.866816	6.72793e-12	6.94505e-10
Klf13	1.81654	2.97279e-29	2.5317e-26
Klf3	0.58279	0.000301719	0.0042775
Klf7	1.25046	5.90917e-08	2.80552e-06
Klhl11	0.670559	4.8696e-08	2.36132e-06
Klhl34	1.16039	7.97857e-23	3.39737e-20
Klhl4	-0.550245	4.24274e-05	0.000859169
Krcc1	-0.511117	4.12182e-05	0.00083952
Krt77	0.827271	0.000290361	0.00412561
Ksr1	0.612842	7.63359e-08	3.57441e-06
Ksr2	1.88677	8.15111e-14	1.18156e-11
Lair1	-0.579442	0.000656154	0.00776782
Lass1	0.702811	2.50513e-07	1.03439e-05
Lass2	-0.530466	2.50769e-06	7.76585e-05
Lass6	0.535731	9.03462e-06	0.000229675
Ldoc1l	0.327012	0.000477105	0.00608711
Lgi2	0.716604	2.68408e-06	8.25236e-05
Lhfpl3	-0.432609	6.20356e-05	0.00117566
Lhfpl4	0.374744	3.27225e-05	0.000690211
Litaf	-0.755488	3.91764e-10	2.90118e-08
Lmbrd2	0.43675	0.000608948	0.00734944
Lmo4	-0.330372	0.000115849	0.00197073
Lmtk2	0.312648	0.000603824	0.00730702
Lmtk3	0.742788	3.69693e-15	6.37649e-13
Lpar1	-0.361524	0.000490339	0.0062268
Lpcat1	0.748765	7.11547e-06	0.000187898
Lpgat1	1.10556	5.84761e-18	1.41835e-15
Lphn1	0.298062	0.000698382	0.00812973
Lpin2	0.612116	7.96806e-08	3.71533e-06
Lrch4	1.05147	2.88844e-06	8.78524e-05
Lrfn1	1.08038	2.621e-18	6.73844e-16
Lrfn3	0.471861	3.66619e-05	0.000760358
Lrfn4	0.521795	1.78316e-06	5.80462e-05
Lrp1	0.369279	5.11724e-05	0.00100684
Lrp6	0.764228	4.13649e-07	1.59671e-05
Lrrc68	0.387351	5.08734e-05	0.00100319
Lrrc7	0.464469	7.33864e-05	0.00133864
Lrrc8b	0.512988	1.42933e-05	0.000338127
Lsamp	0.403244	0.000455367	0.00588034
Lxn	-0.516398	2.08879e-05	0.000468957
Ly86	-0.582916	0.000603066	0.00730433
Lyrm2	-0.464363	0.000203039	0.00310855
Lyrm4	-0.458361	3.39636e-05	0.000715283
Lyve1	-2.29057	0.000352231	0.00481394
Lzts1	0.784814	4.52201e-13	5.70527e-11
Lzts2	0.368036	0.000645174	0.00766447
Mad2l1	-0.567392	0.000277816	0.00398476
Mafg	0.888079	5.48676e-12	5.75096e-10
Mag	-0.724023	4.21337e-15	7.17643e-13
Magi2	0.70786	4.06617e-10	2.9949e-08
Mal	-0.627288	6.41792e-13	7.87844e-11
Mamld1	0.499533	2.4367e-05	0.000536388
Man1a2	0.487572	7.71324e-06	0.000200957
Man2a2	1.33121	2.84887e-23	1.25222e-20
Map2k1ip1	-0.407013	0.000361991	0.00492756
Map2k7	0.446317	0.000181177	0.00281817
Map3k10	0.671631	3.87263e-13	5.02556e-11
Map3k11	0.556716	7.28422e-05	0.00133228
Map3k13	0.560931	7.87246e-06	0.000204324
Map3k14	-1.63758	1.42421e-05	0.000337898
Map3k9	1.71699	1.4116e-19	4.47314e-17
Mapk8ip1	0.357485	6.55886e-05	0.00122931
Mapk8ip3	0.410979	4.05255e-06	0.000116744
Marcks	-0.298279	0.000476681	0.00608711
Mark4	0.453513	3.93858e-05	0.000808239
Marveld2	2.01812	6.8537e-05	0.0012758
Mat2a	-0.384325	3.42984e-05	0.00072122
Matk	0.41274	6.66414e-05	0.00124733
Mbnl1	-0.336601	0.000221987	0.00333621
Mbp	-0.706751	1.8492e-17	4.19953e-15
Mcts1	-0.48483	1.78997e-05	0.000408545
Mdga1	0.608363	8.68164e-06	0.000222361
Mdm4	0.750736	3.49426e-07	1.38813e-05
Mecp2	0.435816	1.56115e-06	5.17574e-05
Med25	0.404115	0.000379393	0.0051235
Mef2a	0.346405	0.000666312	0.00786413
Mef2c	0.468841	3.61048e-07	1.43013e-05
Mef2d	0.811616	2.39209e-16	4.65637e-14
Megf9	0.56521	1.36567e-08	7.3262e-07
Mettl5	-0.604842	0.000197426	0.00303969
Mfap3l	0.710805	3.94916e-07	1.54187e-05
Mgat1	0.477528	9.36854e-07	3.2901e-05
Mgat3	0.582666	1.1045e-10	9.23306e-09
Mgat5	1.34285	5.93319e-18	1.41835e-15
Mgat5b	0.342304	0.000631075	0.00754301
Mgst3	-0.415226	0.000147267	0.00239134
Mib1	0.827467	4.10163e-11	3.80196e-09
Mib2	0.592641	9.72924e-09	5.34559e-07
Mical3	1.59672	1.37371e-08	7.34044e-07
Mier2	0.51235	0.000141936	0.00233014
Mier3	-0.477665	2.2039e-05	0.000490988
Mink1	0.481315	1.52961e-07	6.55423e-06
Mkl2	1.27879	1.90008e-26	1.43836e-23
Mmp28	1.64849	8.77623e-05	0.00155104
Mobp	-0.480997	1.69655e-07	7.17923e-06
Mocs2	-0.365677	0.000341876	0.00471021
Mog	-0.750853	5.48965e-14	8.22e-12
Mphosph6	-0.644097	1.50665e-05	0.000353349
Mpnd	0.398806	0.000671133	0.00790394
Mrpl18	-0.353943	0.000750412	0.00863607
Mrpl48	-0.429935	0.000629614	0.00753215
Mt3	0.307257	0.000865666	0.00962118
Mta3	0.725725	3.89564e-07	1.53416e-05
Mtap1a	0.593075	1.48718e-11	1.45787e-09
Mtap1s	0.447918	1.20161e-05	0.000294214
Mtap7d2	-0.29645	0.000782891	0.00884111
Mtmr9	0.751114	3.26471e-13	4.31893e-11
Muc6	0.805508	8.86399e-06	0.000225758
Mum1	0.555785	4.8824e-06	0.000134944
Mxd4	0.488532	0.000568632	0.00698034
Myo16	0.561241	2.46774e-06	7.67705e-05
Myo1b	-0.460293	0.000165823	0.00262124
Myo1e	-0.622997	9.36112e-06	0.00023709
N28178	0.492487	8.33933e-08	3.81314e-06
Nap1l2	-0.328129	0.000174837	0.00273831
Nat8l	0.409811	3.95169e-06	0.00011456
Nav1	0.476584	2.39675e-05	0.000529305
Nav3	0.689552	6.24092e-10	4.33871e-08
Nbn	-0.469902	0.000631812	0.0075452
Ncoa1	0.526751	7.44033e-07	2.74005e-05
Ncor2	0.583216	2.1522e-09	1.32696e-07
Ndrg1	-0.367137	5.78208e-05	0.00111124
Ndst1	0.79504	7.00532e-16	1.28993e-13
Ndufs8	-0.347185	0.000695923	0.00811176
Nebl	0.620006	5.82925e-07	2.18814e-05
Nedd8	-0.314729	0.000757403	0.00866677
Nefm	-0.348983	9.33703e-05	0.0016374
Nes	0.591986	6.68135e-05	0.00124884
Neurl	0.411059	3.9599e-06	0.00011456
Neurod6	-0.32296	0.000228835	0.00340405
Nfasc	0.518944	5.48158e-07	2.06903e-05
Nfix	1.3014	3.02435e-37	8.24197e-34
Ninj2	-1.8301	4.16321e-05	0.000846685
Nisch	0.364877	3.81265e-05	0.000788334
Nkx6-2	-0.739937	0.000106772	0.00184864
Nlgn2	0.329879	0.000191099	0.00294894
Nlgn3	0.473513	8.99921e-07	3.20165e-05
Nme7	-0.430074	1.48072e-06	4.94518e-05
Nol7	-0.519738	1.6236e-05	0.000374335
Nos1	1.73712	1.04888e-24	5.10431e-22
Nos1ap	0.727532	1.87204e-13	2.57661e-11
Notch3	0.498161	0.000586233	0.00713215
Nova2	0.490329	2.08907e-05	0.000468957
Npat	-0.436888	0.000232216	0.00344682
Npm1	-0.534852	1.90282e-08	9.74728e-07
Nptn	-0.427972	4.10104e-07	1.58752e-05
Nptxr	1.88569	1.66174e-49	2.26429e-45
Npy	-0.6266	1.55933e-09	9.97532e-08
Nr2c2	0.913546	2.66419e-10	2.05098e-08
Nr2f6	0.503466	1.60005e-05	0.00036953
Nrip1	0.436809	0.000520553	0.00650142
Nrp2	0.398896	0.000259188	0.00376481
Nrxn2	0.296779	0.00078089	0.00884111
Nsbp1	-0.542378	1.20711e-05	0.00029424
Nt5dc3	0.356114	0.000114181	0.00194723
Ntn2l	0.722504	8.37189e-07	3.02587e-05
Nts	-1.19124	0.000123341	0.00207412
Numa1	0.353805	0.000782032	0.00884111
Nup50	0.537472	5.46138e-07	2.06713e-05
Nus1	0.542411	6.50918e-06	0.000174595
Nwd1	1.46586	3.58387e-13	4.69556e-11
Nxph4	-0.597691	4.89191e-05	0.000968854
Oaz1	-0.435857	7.06666e-05	0.00130652
Obsl1	0.772606	1.7964e-06	5.81418e-05
Odz1	0.909332	1.99131e-08	1.01624e-06
Odz3	0.456341	9.48377e-06	0.000239307
Odz4	1.14364	3.24413e-26	2.21023e-23
Ola1	-0.476211	1.22882e-07	5.36665e-06
Olfm3	-0.436564	3.44238e-06	0.000102191
Omg	-0.321553	0.000288615	0.00411187
Opa1	0.353871	0.00057506	0.00703391
Opa3	0.447094	0.000108245	0.00186118
Opalin	-0.678563	6.73769e-06	0.000179663
Oprd1	0.759451	1.47808e-06	4.94518e-05
ORF61	0.336359	0.000879159	0.00973937
Otof	0.737289	5.94159e-06	0.000160954
OTTMUSG00000017459	0.475981	3.77569e-06	0.000110166
Otud7a	0.608176	6.19607e-08	2.93152e-06
P2ry12	-0.615215	1.18821e-09	7.7467e-08
Pag1	0.803445	0.000139431	0.00229177
Pak3	0.558335	0.000259398	0.00376481
Pak6	0.356821	0.000403009	0.00537845
Pak7	-0.311012	0.000757636	0.00866677
Parc	0.688057	1.21531e-10	1.00975e-08
Pbxip1	0.562849	5.93456e-05	0.00113485
Pcdh1	1.63247	3.40053e-48	1.54452e-44
Pcdh17	0.392325	5.34229e-05	0.00103991
Pcdha12	0.919192	1.14137e-06	3.93728e-05
Pcdha9	0.82312	0.00014764	0.00239209
Pcdhac2	0.564464	2.1148e-06	6.70146e-05
Pcdhb22	0.740484	1.49159e-05	0.000350422
Pcdhga12	0.872437	4.28633e-10	3.12329e-08
Pcdhga2	0.806249	6.78593e-05	0.00126491
Pcdhga3	1.02897	7.68804e-10	5.29077e-08
Pcdhga6	0.788957	1.07745e-06	3.7357e-05
Pcdhga9	0.956086	4.80611e-07	1.8344e-05
Pcdhgb6	0.882817	1.06937e-07	4.74799e-06
Pcdhgc3	0.695484	6.98782e-11	6.18286e-09
Pcdhgc4	0.877907	2.31761e-09	1.40981e-07
Pcdhgc5	0.746631	2.53363e-14	3.96818e-12
Pcgf3	0.379528	0.00044654	0.00580154
Pcnp	-0.321962	0.000894896	0.00986557
Pcnx	0.358855	8.33385e-05	0.00148247
Pcnxl3	0.515518	4.62305e-06	0.000129119
Pcp4	-0.900674	1.34797e-25	8.74637e-23
Pcyt1a	0.709143	2.68424e-05	0.000582412
Pdcd10	-0.456469	0.000267892	0.00386274
Pde4d	0.90676	5.28471e-09	3.02561e-07
Pde7b	1.15799	6.05004e-05	0.00114976
Pdhb	-0.361096	0.000148595	0.00240258
Pdlim2	-0.911697	1.29941e-10	1.07308e-08
Pdrg1	-0.454822	0.000121344	0.0020514
Pdxk	0.404714	7.61634e-06	0.000198813
Pdzd4	0.35667	7.9561e-05	0.00143021
Peg10	-0.615921	1.89265e-06	6.09675e-05
Peg3	0.531365	2.46274e-08	1.23828e-06
Peli3	0.780176	2.79853e-05	0.000603366
Penk1	-0.361641	0.000410771	0.00545533
Perp	0.694441	0.000251848	0.00369395
Pex3	-0.523021	2.61681e-05	0.000569596
Pex6	0.601875	1.4976e-08	7.85987e-07
Phc3	1.37116	1.37947e-08	7.34246e-07
Phyh	-0.351471	0.000231493	0.00343984
Phyhip	0.308944	0.000406149	0.00541506
Phyhipl	-0.321752	0.000205837	0.00313378
Pias4	0.712985	0.000154107	0.00247043
Pigh	-0.524457	0.000119077	0.00201808
Pik3ca	0.433207	0.000653355	0.00774141
Pip4k2a	-0.341262	0.000164891	0.00260953
Pip5k1c	1.22568	3.13006e-32	4.26503e-29
Pitpnm1	0.69428	1.52441e-13	2.11956e-11
Pkn1	0.57501	8.55291e-05	0.00151747
Plcg1	0.597424	1.71312e-06	5.60268e-05
Plch2	0.496886	5.49264e-05	0.0010616
Plec1	0.603607	1.73134e-10	1.37158e-08
Plekha1	-0.372511	5.76301e-05	0.00110914
Plekha6	0.677197	1.99705e-09	1.2369e-07
Plekhb1	-0.573842	2.91528e-11	2.73956e-09
Pllp	-0.385737	0.000255255	0.00372389
Plp1	-0.888945	1.17282e-26	9.40051e-24
Pls3	-0.327338	0.00014376	0.00235014
Plxna1	1.4636	9.92753e-30	9.66232e-27
Plxna4	0.36023	0.000136158	0.00224611
Plxnb1	0.386325	0.000196085	0.00302246
Plxnd1	0.496527	2.56594e-05	0.000559416
Pmp22	-0.597937	1.2314e-05	0.000296038
Pnmal1	0.517696	5.48027e-08	2.63866e-06
Pnmal2	1.16776	2.97016e-36	6.74522e-33
Pno1	-0.498669	8.12265e-05	0.00145248
Pnp1	-0.523457	0.000797605	0.00898195
Pnrc1	-0.41476	1.12747e-05	0.000278818
Pogk	0.338953	0.000840566	0.00938816
Pom121	0.393599	7.49719e-05	0.00136209
Ppapdc1	-0.518886	0.000688807	0.00804948
Ppargc1b	1.21107	2.74937e-05	0.000593707
Ppfia3	0.360207	8.90046e-05	0.00156689
Ppig	-0.341589	0.000313968	0.0044333
Ppm1l	0.687985	9.59244e-11	8.16916e-09
Ppp1r12b	2.09457	3.20857e-30	3.36307e-27
Ppp1r15b	0.596633	6.35966e-07	2.37416e-05
Ppp1r16a	0.696505	1.26946e-11	1.25345e-09
Ppp1r16b	0.532871	7.50495e-06	0.000196967
Ppp1r9b	0.39963	4.46594e-06	0.00012547
Ppp2r2a	-0.407213	6.69336e-06	0.000178831
Ppp3ca	-0.368954	1.24485e-05	0.000298107
Prdm2	0.576348	5.55482e-08	2.65579e-06
Prei4	-0.368228	0.000179857	0.00280321
Prelp	0.450995	9.82526e-05	0.0017142
Prickle2	1.39101	1.4321e-29	1.30092e-26
Prkar2a	0.396297	4.90167e-05	0.000969379
Prkce	0.553676	3.26419e-09	1.94226e-07
Prkg1	0.630124	0.000478859	0.00609806
Prosapip1	0.37899	2.89993e-05	0.000622275
Prr18	-0.50217	8.3941e-07	3.02587e-05
Prr7	0.406297	0.000422984	0.00557406
Psd4	2.22907	0.000127322	0.00212609
Psip1	-0.31974	0.00042176	0.00556871
Psma1	-0.461166	5.33256e-06	0.000145907
Psma4	-0.408246	3.231e-05	0.000685758
Psmc2	-0.323449	0.000666776	0.00786413
Psmc6	-0.379424	0.000150209	0.00242218
Psmd7	-0.299944	0.000882502	0.00976053
Ptbp2	-0.420307	2.679e-06	8.25236e-05
Ptch1	0.856124	3.52787e-08	1.74803e-06
Ptchd2	0.426111	0.000619035	0.00743824
Ptger1	0.604927	6.97111e-05	0.00129236
Ptges3	-0.338413	0.000355784	0.00485763
Ptgfrn	0.555846	1.57685e-06	5.2151e-05
Ptgs2	-0.550597	8.10986e-05	0.0014521
Ptma	-0.379823	0.000318788	0.00445245
Ptov1	0.924983	9.33036e-19	2.54271e-16
Ptpn14	0.550395	0.000885121	0.00978155
Ptprf	0.450223	4.64675e-06	0.000129482
Ptprj	0.333618	0.00062212	0.00745559
Ptprn2	0.700353	1.46998e-13	2.06494e-11
Ptprs	0.369505	3.92259e-05	0.000806173
Ptprt	1.45711	3.10596e-35	5.29023e-32
Puf60	-0.296829	0.000823487	0.00922766
Purb	1.55551	4.63684e-36	9.02595e-33
Pvrl1	0.43364	2.47161e-05	0.000543196
Qdpr	-0.298209	0.000797339	0.00898195
Rab11fip4	1.49115	2.96634e-48	1.54452e-44
Rab30	0.69796	0.000521039	0.00650153
Rab3c	0.660298	1.33532e-12	1.59605e-10
Rab9	-0.372535	0.000222365	0.00333621
Rad52	-0.813378	2.22035e-05	0.000493548
Rad54l2	0.615503	2.97194e-07	1.19456e-05
Rai1	0.563627	2.94603e-07	1.18765e-05
Ralgps2	0.656843	9.27593e-05	0.00162879
Ranbp9	-0.367684	7.90343e-05	0.0014245
Rapgef5	0.666985	8.01635e-08	3.71533e-06
Rasal2	0.742476	9.54219e-06	0.000239893
Rasgrf2	1.07994	1.72942e-12	2.01411e-10
Rasl10b	0.405953	4.41578e-06	0.000124389
Rassf4	-0.919832	3.15439e-05	0.00067264
Rbm39	-0.433941	3.14752e-06	9.48851e-05
Rbm5	-0.392543	0.000199965	0.00306838
Rbm9	0.474001	1.24565e-07	5.42276e-06
Rbmx	-0.375759	0.000316086	0.00444477
Rcc2	0.663989	2.11599e-08	1.07584e-06
Rell2	0.858929	2.52428e-10	1.96547e-08
Resp18	-0.420651	4.25057e-05	0.000859322
Rexo1	0.45626	2.81234e-05	0.000604431
Rfx3	1.48126	1.71019e-06	5.60268e-05
Rgl2	0.605477	0.000875778	0.00970981
Rgn	-2.75013	0.000735289	0.00849072
Rgp1	0.464807	4.7947e-05	0.000950984
Rhbdl1	0.435286	0.000124302	0.00208588
Rhobtb2	0.370308	7.57968e-05	0.00137341
Rhog	-0.586964	6.72529e-07	2.49018e-05
Rhpn2	-0.853109	1.47238e-05	0.000347105
Rimbp2	0.906335	1.70323e-16	3.36476e-14
Rims1	0.374688	0.000316426	0.00444496
Rims3	1.68808	1.70386e-16	3.36476e-14
Rims4	1.32828	3.54492e-14	5.48898e-12
Rin2	-0.475312	9.50499e-06	0.000239399
Riok1	-0.803371	1.13929e-05	0.000280723
Rmnd5a	0.464694	7.29006e-06	0.000192136
Rnf10	0.313745	0.000554822	0.00684163
Rnf115	-0.408499	1.2391e-05	0.000297252
Rnf13	-0.411008	7.97389e-06	0.000206171
Rnf150	1.41431	1.6506e-23	7.75557e-21
Rnf31	0.461514	0.000511044	0.00640026
Rorb	0.908008	0.000108682	0.00186277
Rpl13	-0.384686	0.000756719	0.00866677
Rpl23	-0.430441	1.25716e-05	0.000300526
Rplp1	0.309394	0.000639132	0.0076099
Rprm	-0.368908	3.09148e-05	0.000660258
Rps2	0.458836	0.000493546	0.00625006
Rps27l	-0.756024	0.000133579	0.00221159
Rps6ka2	0.347924	0.000522243	0.0065106
Rps6kc1	0.372758	0.000575814	0.00703681
Rsl1d1	-0.381043	0.000161636	0.00256695
Rsrc2	-0.393701	5.22989e-05	0.00102536
Rtn2	0.423894	1.21335e-05	0.000295234
Rtn4rl2	0.689808	1.00789e-10	8.47752e-09
Rusc2	0.517555	4.00322e-08	1.95512e-06
Rwdd2a	-0.363933	0.000319651	0.0044581
S1pr5	-0.620064	2.43505e-06	7.59268e-05
Samd14	0.623057	2.79877e-09	1.68744e-07
Samd4	0.87044	1.10825e-06	3.83274e-05
Sap30l	0.481011	0.000173972	0.00273103
Saps1	0.43837	8.0315e-06	0.000206876
Saps2	0.46698	1.82519e-05	0.000415887
Sar1b	-0.398975	5.57889e-05	0.00107674
Sarm1	0.443149	0.000220985	0.0033346
Sbf1	0.59178	5.79761e-10	4.07208e-08
Sc4mol	-0.399464	1.13388e-05	0.000279895
Scaf1	0.783301	3.86266e-17	8.6283e-15
Scg3	-0.434046	4.75127e-07	1.81856e-05
Scg5	-0.35069	6.76646e-05	0.00126301
Scn2b	0.335189	0.000144188	0.00235263
Scoc	-0.390966	2.1145e-05	0.000473107
Scrib	0.644312	1.77508e-05	0.000405826
Scrn1	0.501166	2.58108e-07	1.05933e-05
Sdc3	0.43287	1.26017e-06	4.30353e-05
Sdccag1	-0.462839	5.32867e-06	0.000145907
Sdk2	1.60791	3.00689e-18	7.58738e-16
Sec22c	0.88511	3.09575e-13	4.13556e-11
Sema3c	-0.324527	0.000859655	0.00956998
Sema3g	1.03379	5.51357e-06	0.000150256
Sema6b	0.523363	2.16527e-08	1.0968e-06
Sema6c	0.87981	3.78612e-06	0.000110234
Sep15	-0.340608	0.000124668	0.00208688
Sepsecs	1.03448	0.000768008	0.00876455
Sept4	-0.711195	1.12801e-14	1.8298e-12
Sept7	-0.484293	1.04982e-08	5.72193e-07
Serinc1	-0.315065	0.00016894	0.00266432
Serpini1	-0.283542	0.000821512	0.0092131
Sesn3	0.929159	4.18414e-14	6.40597e-12
Set	-0.432246	4.18709e-06	0.000119358
Setbp1	1.23293	1.40993e-12	1.67059e-10
Setd1a	0.471324	3.90172e-05	0.000803218
Sf3a3	-0.498507	4.23089e-05	0.000859168
Sfmbt1	0.589468	0.000646248	0.00767054
Sfrp1	-0.404622	0.000446633	0.00580154
Sfrs10	-0.546332	2.80169e-07	1.13958e-05
Sfrs14	0.507673	1.0144e-06	3.55327e-05
Sfrs3	-0.377507	3.60441e-05	0.000750975
Sfrs5	-0.358531	0.00028879	0.00411187
Sgce	-0.433506	0.000377922	0.00510869
Sgk1	-0.466577	6.85188e-06	0.000182351
Sgk2	-1.44286	6.05926e-05	0.00114991
Sgpl1	-0.390162	0.000549215	0.00678986
Sgsm2	0.461386	1.93188e-06	6.20843e-05
Sh2d3c	0.419862	0.000706725	0.00820957
Sh3bp5	-0.335519	0.000451131	0.00584882
Sh3gl3	-0.371146	0.000321485	0.00447451
Sh3pxd2a	1.00163	7.60642e-09	4.23041e-07
Shank2	0.764968	3.57306e-15	6.24186e-13
Shank3	1.52014	2.705e-40	9.2146e-37
Shc3	1.1012	9.82302e-12	9.9147e-10
Sipa1l1	0.645622	2.36499e-12	2.70801e-10
Sipa1l3	0.356847	0.000799495	0.0089958
Sirt2	-0.340964	0.000433159	0.00567522
Skp1a	-0.342351	6.36646e-05	0.00119985
Slain1	-0.432923	6.16549e-06	0.000166595
Slc12a2	-0.428515	6.91659e-06	0.000183001
Slc16a11	0.619185	0.000314939	0.0044378
Slc1a2	1.18626	5.18927e-35	7.85656e-32
Slc25a17	-0.341397	0.000847161	0.00944633
Slc25a34	0.8192	1.09301e-05	0.000271776
Slc26a2	1.03084	0.000442656	0.00577742
Slc35b3	-0.95869	8.23432e-08	3.77781e-06
Slc36a4	0.897517	3.17012e-09	1.90291e-07
Slc38a1	0.914972	3.24852e-19	9.03355e-17
Slc38a10	0.557108	8.05144e-08	3.71894e-06
Slc38a9	0.670624	0.000736157	0.00849354
Slc39a12	-0.404433	0.000760609	0.00868739
Slc43a2	0.613049	1.82335e-07	7.62114e-06
Slc44a1	-0.480853	2.10156e-06	6.67501e-05
Slc45a4	1.10248	1.85506e-14	2.97377e-12
Slc4a3	0.483698	5.67496e-07	2.1361e-05
Slc4a8	0.490889	1.66136e-07	7.07428e-06
Slc6a17	0.442888	4.24042e-07	1.6322e-05
Slc6a6	0.355706	0.000168893	0.00266432
Slc8a2	0.334356	0.00014669	0.0023852
Slc8a3	0.563277	0.000164653	0.00260879
Slc9a7	0.99153	9.32641e-07	3.28906e-05
Slco1a4	-0.36552	0.000311722	0.0044084
Slco1c1	-0.426671	6.36467e-05	0.00119985
Slit1	0.59794	4.85399e-07	1.8475e-05
Slit3	0.762827	3.46613e-08	1.7237e-06
Smarca5	-0.44147	8.27577e-06	0.000212365
Smarce1	-0.502806	3.63166e-06	0.00010711
Smc2	-0.825701	8.21344e-07	2.9765e-05
Smc6	-0.369257	0.000644677	0.00766447
Smcr8	0.44907	1.67065e-05	0.000383236
Smox	0.486674	6.51407e-05	0.0012226
Snap25	-0.544211	5.90149e-11	5.32541e-09
Snf1lk2	0.919616	2.1038e-05	0.000471486
Snph	0.361833	4.36266e-05	0.000875488
Snrk	0.358311	0.000318919	0.00445245
Snrpd1	-0.455508	8.06641e-06	0.000207383
Snx10	-0.319384	0.000238568	0.0035143
Snx24	-0.66462	2.17434e-06	6.85822e-05
Snx8	0.509839	0.000373354	0.00505601
Socs7	0.56299	8.75781e-10	5.87852e-08
Solh	0.822349	3.20027e-09	1.91258e-07
Sorcs1	0.404738	0.000239899	0.00353009
Sorl1	0.488248	1.04645e-06	3.63749e-05
Sort1	0.301103	0.000594866	0.00722429
Sp140	-2.57613	0.000371571	0.00503784
Sparcl1	-0.328645	8.67871e-05	0.00153779
Spata2	0.438206	5.46682e-06	0.00014928
Spnb1	0.629995	1.37962e-10	1.12567e-08
Spnb3	0.454301	2.5501e-07	1.04978e-05
Spnb4	0.612782	3.52305e-10	2.62323e-08
Spns1	0.45861	4.26308e-05	0.000860573
Spock2	0.739113	7.18022e-17	1.52871e-14
Spock3	-0.415931	1.11111e-05	0.0002757
Spp1	-0.858619	0.000266114	0.00384525
Spred2	0.346634	0.000317584	0.00445157
Spred3	0.37935	0.000286723	0.00409527
Sra1	-0.396075	0.000496448	0.00627514
Srebf2	0.434529	1.79613e-06	5.81418e-05
Srgap3	0.309574	0.000471593	0.00604232
Ssb	-0.522171	1.64204e-08	8.53986e-07
Ssh1	0.877126	5.32528e-06	0.000145907
Ssh2	1.34629	7.08456e-14	1.038e-11
Ssh3	0.721319	0.000132842	0.00220437
Sst	-0.395988	4.19955e-06	0.000119464
Sstr4	1.44123	3.22072e-18	7.97918e-16
Stam	-0.32545	0.000581193	0.00708982
Stambp	-0.352404	0.000779837	0.00884111
Stard3nl	-0.43546	0.000108613	0.00186277
Stip1	-0.293161	0.000871337	0.00967632
Stk32c	0.334896	0.000343543	0.00472841
Stmn2	-0.281299	0.000891078	0.00983144
Ston2	1.30262	3.94812e-07	1.54187e-05
Stra6	0.73239	0.000179356	0.00279943
Stub1	0.454927	1.22757e-05	0.000296038
Stx1b	0.930027	8.83421e-23	3.64772e-20
Susd5	-0.441796	0.000616826	0.00741824
Suv420h1	0.414176	0.000422359	0.00557122
Svop	0.328778	0.000228135	0.0033981
Syngr1	0.460989	1.36141e-07	5.87042e-06
Synj2	0.397436	9.19704e-05	0.00161702
Synpo	0.419861	2.69661e-06	8.25709e-05
Syt10	0.981646	0.000142848	0.00233949
Syt17	0.835854	5.35163e-15	8.7857e-13
Syt2	1.25649	3.15862e-06	9.50097e-05
Tac1	-0.601633	1.44922e-06	4.87582e-05
Tagap1	-0.497718	4.97523e-05	0.0009825
Tank	-0.515801	1.82884e-05	0.000416022
Tbc1d12	-0.489409	0.000199771	0.00306838
Tbc1d15	-0.38372	0.000499459	0.0063015
Tbc1d16	2.0807	1.3799e-18	3.61586e-16
Tbc1d20	0.658472	3.60182e-08	1.7782e-06
Tbc1d24	0.484738	1.95354e-05	0.000442174
Tbc1d7	-0.547095	0.000505451	0.00634915
Tbkbp1	0.596568	3.45491e-09	2.04681e-07
Tbl1x	0.666195	5.90189e-07	2.20932e-05
Tbp	-0.520994	0.000187568	0.00290763
Tceal1	-0.342084	0.000456023	0.00588034
Tceal5	-0.369678	0.000135507	0.00223809
Tceal7	-1.19236	1.97484e-05	0.000445598
Tcp11l2	-0.437109	0.000128869	0.00214929
Tfb2m	-0.695227	0.000223083	0.00334036
Tfg	-0.35653	0.000383747	0.00515167
Tfrc	-0.413494	3.63151e-06	0.00010711
Thbs4	-0.677834	0.00023298	0.00345064
Thoc2	-0.434614	7.93081e-05	0.00142755
Thra	0.606763	1.08164e-11	1.0758e-09
Thsd4	0.922947	0.000265321	0.00383786
Timm23	0.976833	0.000337642	0.00466131
Tle2	0.823767	0.00041329	0.0054781
Tle4	-0.328252	0.000323292	0.0044905
Tmcc2	0.641948	1.06725e-12	1.28693e-10
Tmeff2	-0.31952	0.000549627	0.00678986
Tmem132a	0.399971	6.17425e-06	0.000166595
Tmem132d	0.722466	5.10282e-09	2.94623e-07
Tmem14a	-0.52963	2.26616e-06	7.1149e-05
Tmem14c	-0.413225	0.000540826	0.00672381
Tmem151b	0.529465	7.55799e-09	4.2207e-07
Tmem164	0.370368	0.00043766	0.00572318
Tmem16d	-0.625811	1.5479e-05	0.000361158
Tmem188	-0.405314	0.000258849	0.00376481
Tmem198	0.404018	7.13566e-05	0.00131454
Tmem28	1.19127	8.3498e-09	4.62497e-07
Tmem49	-0.319749	0.000596048	0.00722576
Tmem59	-0.302187	0.000690616	0.0080637
Tmem70	-0.404477	3.45365e-05	0.000722879
Tmf1	-0.493602	0.00021208	0.0032109
Tnfaip6	-0.853179	1.59536e-05	0.000369073
Tnk2	0.613685	2.41399e-11	2.28424e-09
Tnks	0.392709	0.000222561	0.00333621
Tnks1bp1	0.410323	4.3512e-05	0.000875488
Tnr	0.927522	4.28521e-13	5.50852e-11
Tnrc18	0.485126	7.90651e-06	0.000204818
Tom1l2	0.309992	0.000478852	0.00609806
Top1	-0.356011	0.000161246	0.00256657
Top2a	-1.47636	9.44732e-06	0.00023883
Tox2	0.453575	0.000349836	0.00478742
Tppp3	-0.409008	0.000418591	0.00553759
Traf3	0.409591	0.000132981	0.00220437
Trf	-0.77174	1.03974e-17	2.44268e-15
Trim13	-0.536714	0.000131851	0.00219132
Trim44	0.299641	0.000620507	0.00744596
Trim59	-0.61561	1.21131e-07	5.32432e-06
Trim66	0.37395	0.000545691	0.00676577
Trmt6	-0.404482	0.000272519	0.00392531
Trpc5	0.937939	1.40441e-07	6.03676e-06
Trpm2	0.497622	3.49134e-05	0.00072853
Trpm3	0.608059	7.13899e-05	0.00131454
Tsg101	-0.403995	6.35538e-05	0.00119985
Tspan2	-0.555634	5.27564e-10	3.74406e-08
Ttc35	-0.397261	0.000253033	0.00370336
Ttyh2	-0.510929	3.3637e-06	0.000100733
Ttyh3	0.377397	2.70313e-05	0.000584914
Tuba1a	-0.474385	1.45451e-08	7.71172e-07
Tubb2c	-0.304336	0.000550684	0.00679676
Tubb4	-0.284855	0.000682097	0.00800539
Twf1	-0.355512	0.000416673	0.00551757
Txndc10	-0.356256	0.000107437	0.00185544
Tyms	-1.69479	0.000100559	0.00174773
Uba52	-0.925467	1.7146e-06	5.60268e-05
Ube2d1	-0.49785	2.09298e-06	6.67267e-05
Ube2g1	-0.390969	5.40944e-05	0.001047
Uchl5	-0.429567	0.000198023	0.00304544
Ugt8a	-0.704851	3.0326e-12	3.38706e-10
Uhmk1	1.15212	2.15331e-23	9.78034e-21
Unc13a	0.915752	4.90966e-17	1.06189e-14
Unc5a	0.480312	4.36384e-07	1.67498e-05
Unc5d	1.20611	2.90113e-07	1.17302e-05
Upf3b	-0.513678	1.88707e-05	0.000428554
Uqcrb	-0.459255	2.8313e-06	8.63073e-05
Uqcrc2	-0.387721	1.56427e-05	0.000363114
Usp12	0.344469	0.000435818	0.00570456
Usp13	0.616487	9.34144e-07	3.28906e-05
Usp14	-0.347798	0.000105767	0.00183357
Usp20	0.383091	7.98538e-05	0.00143358
Vapa	-0.300054	0.000685176	0.0080346
Vash1	1.63897	7.46479e-22	2.90615e-19
Vav2	1.0769	3.86426e-05	0.000797795
Vgf	0.340324	0.000144393	0.00235263
Vim	-0.372192	0.000488955	0.00621502
Vps13c	0.774276	8.72834e-07	3.1298e-05
Vps13d	0.504119	3.70827e-06	0.000108664
Vps37b	0.43178	0.000142171	0.0023312
Vsnl1	-0.338729	5.37898e-05	0.00104407
Vstm2l	0.485799	7.87872e-07	2.87047e-05
Vwf	0.555926	0.000446109	0.00580154
Wasf2	0.531572	0.000296165	0.00420369
Wasf3	0.843882	3.29243e-16	6.23091e-14
Wbp5	-0.363006	6.912e-05	0.0012849
Wbp7	0.469669	0.000259442	0.00376481
Wdfy3	0.986224	4.9527e-20	1.79328e-17
Wdr22	0.382403	4.66103e-05	0.000927171
Wdr3	-0.631577	2.53002e-05	0.000553357
Wdr51b	-0.675812	3.65866e-05	0.000760358
Wdr6	0.319458	0.000380587	0.0051308
Wdr61	-0.537307	7.12071e-05	0.00131454
Wdr68	0.320447	0.000274126	0.00394012
Wdtc1	0.462174	1.25235e-06	4.28758e-05
Wipf1	-0.52815	4.02382e-05	0.000823251
Wnk2	0.612763	8.03656e-10	5.47531e-08
Wnt1	2.38765	2.20523e-05	0.000490988
Wnt2b	1.15751	6.05004e-05	0.00114976
Wscd2	1.4077	1.58826e-10	1.2656e-08
Wwc1	0.557514	3.81694e-07	1.50752e-05
Wwc2	0.416163	0.00015826	0.00252281
Xkr4	0.980989	4.36833e-11	4.02182e-09
Xkr6	0.869719	0.000840517	0.00938816
Xkr7	1.8988	2.17988e-11	2.07713e-09
Xrn1	0.973478	1.44638e-05	0.000341566
Xrn2	-0.486057	2.70436e-05	0.000584914
Xylt1	1.52764	1.03141e-19	3.4278e-17
Yaf2	-0.309836	0.000506031	0.00634915
Ybx1	-0.330355	0.000409488	0.00544359
Ylpm1	0.34006	0.000504769	0.00634915
Yme1l1	-0.433981	3.43324e-06	0.000102143
Ywhah	-0.289684	0.000584002	0.00711136
Ywhaq	-0.435426	1.22512e-06	4.2049e-05
Zbtb16	0.776125	2.71743e-12	3.06015e-10
Zbtb4	0.307662	0.000769721	0.00876941
Zbtb7a	0.353171	0.000154498	0.00247379
Zc3h7b	0.575375	2.05342e-10	1.61733e-08
Zcchc14	0.352941	0.000471821	0.00604232
Zcchc3	0.787093	8.75995e-06	0.000223526
Zcchc8	-0.451593	0.000425591	0.00558967
Zdhhc22	0.914867	1.9749e-11	1.89507e-09
Zdhhc23	1.16842	4.80855e-06	0.000133173
Zfhx3	-0.610474	0.000281947	0.00403552
Zfp106	0.450028	4.94533e-07	1.87702e-05
Zfp180	0.531983	2.8898e-07	1.17192e-05
Zfp219	0.424763	0.00068606	0.00803806
Zfp316	0.485647	1.27765e-05	0.000304891
Zfp335	0.559436	7.19053e-05	0.00132046
Zfp369	1.31861	5.0508e-08	2.4405e-06
Zfp37	-0.44006	8.29852e-05	0.00148005
Zfp382	0.934296	3.19533e-06	9.5902e-05
Zfp398	0.712515	8.76711e-05	0.00155104
Zfp445	0.479339	2.54777e-05	0.000556344
Zfp516	0.742034	0.000114444	0.00194927
Zfp526	0.956796	8.00756e-08	3.71533e-06
Zfp536	1.00435	0.000176655	0.00276044
Zfp592	0.491846	0.000423986	0.00557653
Zfp609	0.799545	4.5206e-09	2.62118e-07
Zfp62	-0.508074	3.13701e-06	9.48679e-05
Zfp628	0.518599	6.96455e-05	0.00129236
Zfp652	0.653981	0.000129111	0.0021507
Zfp687	0.492268	1.30102e-05	0.000309384
Zfp708	-0.816004	7.80569e-05	0.00140875
Zhx3	0.590241	1.52746e-06	5.08284e-05
Zkscan16	0.633137	2.97459e-08	1.48468e-06
Zmiz1	0.575543	4.30926e-09	2.50932e-07
